# Supplementary material for: Zwitterionic copolymer-based and hydrogen bonding-strengthened self-healing hydrogel
Source: Royal Society of Chemistry journal article supplement (doi:10.1039/c4ra15003a), 2015-01-01
Supplement: c4ra15003a1.pdf [file c4ra15003a1.pdf]

## Supporting Information

### Zwitterionic copolymer-based and hydrogen bonding-strengthened self-healing hydrogel

He Liu,<sup>ab</sup> Chunming Xiong,<sup>a</sup> Zhen Tao,<sup>b</sup> Yujiao Fan,<sup>b</sup> Xiaofen Tang<sup>a</sup> and Haiyang Yang<sup>b</sup>

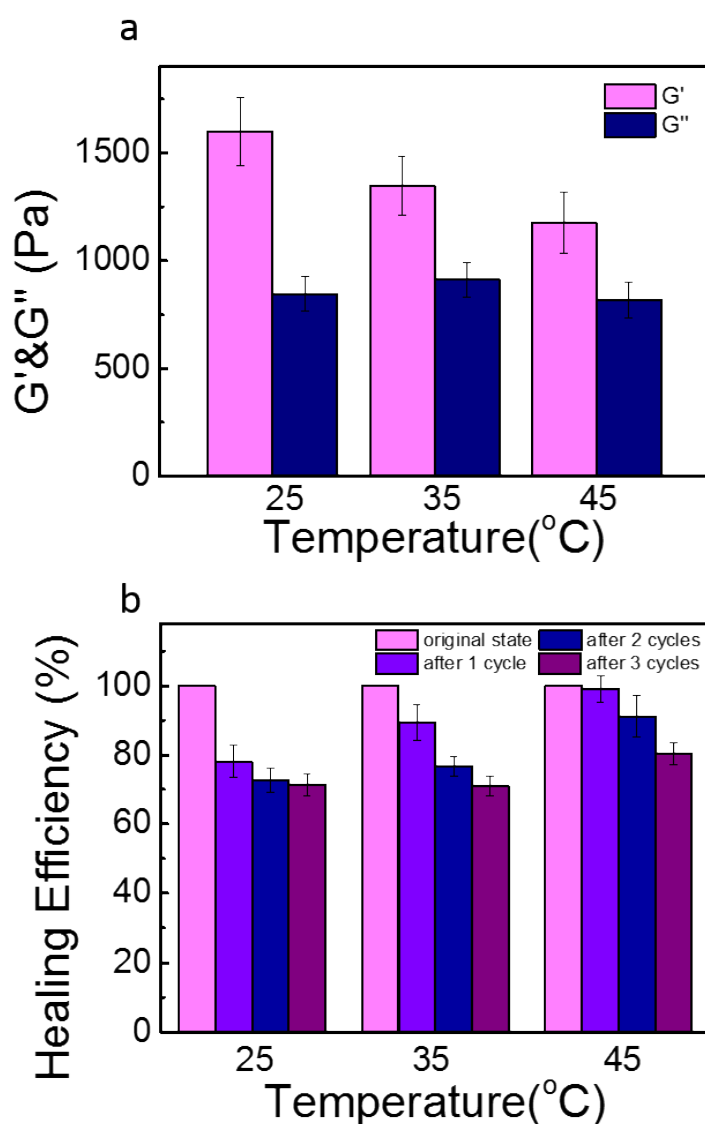

Figure 1. G' and G'' (a) and healing efficiency (b) versus temperature of P(AM<sub>0.3</sub>-co-DMAPS<sub>0.7</sub>)hydrogel.

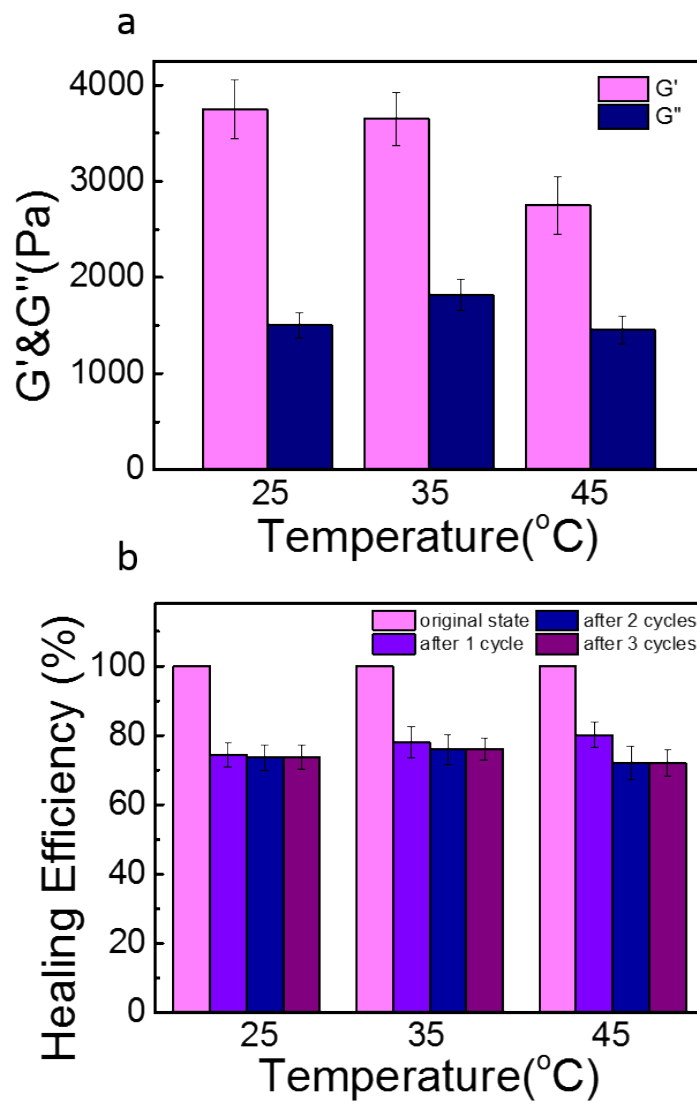

Figure 2.  $G'$  and  $G''$  (a) and healing efficiency (b) versus temperature of  $P(AM_{0.7-co-DMAPS_{0.3}})$  hydrogel.
